# Supplementary material
Source: PubMed Central journal article supplement (PMC2597283)
Supplement: NIHMS79104-supplement-01.pdf [file NIHMS79104-supplement-01.pdf]

## Supplemental Materials

**Supplemental Table 1** Changes in brain lipid levels induced by IDFP, CPO and chlorpyrifos

| Analyte                                                                 | IDFP              |                           |                           | CPO              |                          | Chlorpyrifos <sup>a</sup> |                            |                    |                            |
|-------------------------------------------------------------------------|-------------------|---------------------------|---------------------------|------------------|--------------------------|---------------------------|----------------------------|--------------------|----------------------------|
|                                                                         | Swiss Webster     |                           |                           | Swiss Webster    |                          | KIAA1363 +/+              |                            | KIAA1363 -/-       |                            |
|                                                                         | Control           | 10<br>mg kg <sup>-1</sup> | 30<br>mg kg <sup>-1</sup> | Control          | 4<br>mg kg <sup>-1</sup> | Control                   | 100<br>mg kg <sup>-1</sup> | Control            | 100<br>mg kg <sup>-1</sup> |
| Brain lipid (nmol g <sup>-1</sup> ) (mean ± S.D.) (n=3-8)               |                   |                           |                           |                  |                          |                           |                            |                    |                            |
| Anandamide ( <b>2</b> )                                                 | 0.004 ±<br>0.0002 | 0.051 ±<br>0.004          | 0.049 ±<br>0.003          | 0.016 ±<br>0.002 | 0.011 ±<br>0.002         | 0.0063 ±<br>0.0013        | 0.018 ± 0.0059             | 0.0077 ±<br>0.0033 | 0.019 ±<br>0.0055          |
| 2-AG ( <b>1</b> )                                                       | 3.7 ± 1.0         | 48 ± 6.4                  | 71 ± 7.5                  | 3.7 ± 1.0        | 40 ± 6.2                 | 3.2 ± 0.5                 | 19 ± 5                     | 3.4 ± 0.4          | 54 ± 11                    |
| AA ( <b>6</b> )                                                         | 61 ± 7.5          | 14 ± 1.9                  | 8.1 ±<br>0.25             | 61 ± 7.5         | 30 ± 5.5                 | 56 ± 8                    | 34 ± 6                     | 51 ± 5             | 17 ± 3                     |
| <i>N</i> -Acylethanolamines (pmol g <sup>-1</sup> ) (mean ± S.D.) (n=3) |                   |                           |                           |                  |                          |                           |                            |                    |                            |
| C16:0 ( <i>N</i> -<br>palmitoyl-<br>ethanolamine, <b>10</b> )           | 167 ± 6.0         | 1951 ± 57<br>***          | 1869 ±<br>23 ***          | 151 ± 28         | 810 ± 33<br>***          | 271 ± 138                 | 1279 ± 322 **              | 180 ± 64           | 1507 ±<br>419 **           |
| C18:0 ( <b>29</b> )                                                     | 333 ± 42          | 710 ±<br>56**             | 825 ± 53<br>**            | 229 ± 20         | 576 ± 32<br>***          | 375 ± 120                 | 651 ± 81 *                 | 318 ± 95           | 779 ± 195<br>*             |
| C18:1 ( <i>N</i> -<br>oleoyl-<br>ethanolamine, <b>11</b> )              | 114 ± 3.0         | 1677 ± 29<br>***          | 1491 ±<br>92 ***          | 81 ± 4           | 535 ± 25<br>***          | 117 ± 25                  | 651 ± 81 ***               | 95 ± 42            | 880 ± 209<br>**            |
| C18:2 ( <b>30</b> )                                                     | 6.1 ± 1.6         | 95 ± 8.1<br>***           | 80 ± 6.7<br>***           | ND               | ND                       | ND                        | 18 ± 4.5 ***               | ND                 | 26 ± 8.1<br>**             |
| C20:0 ( <b>31</b> )                                                     | 24 ± 1.9          | 66 ± 5.0<br>**            | 82 ± 28                   | 39 ± 9           | 58 ± 6                   | 113 ± 25                  | 145 ± 29                   | 64 ± 14            | 154 ± 30<br>**             |
| C20:4<br>(anandamide, <b>2</b> )                                        | 4.1 ± 0.2         | 51 ± 3.6<br>***           | 49 ± 2.6<br>***           | 16 ± 2           | 11 ± 2                   | 6.3 ± 1.3                 | 19 ± 5.6 **                | 7.7 ± 3.3          | 19 ± 5.5 *                 |
| C22:0 ( <b>32</b> )                                                     | 21 ± 4.0          | 43 ± 4.0 *                | 42 ± 8.3                  | 21 ± 6           | 29 ± 2                   | 116 ± 38                  | 120 ± 32                   | 90 ± 44            | 160 ± 60                   |
| C22:6 ( <b>33</b> )                                                     | ND                | 44 ± 3.8<br>***           | 58 ± 15 *                 | ND               | ND                       | ND                        | ND                         | ND                 | ND                         |
| C24:0 ( <b>34</b> )                                                     | ND                | 1.8 ±<br>0.1***           | 2.0 ±<br>0.1***           | ND               | ND                       | 0.45 ± 0.90               | 1.9 ± 0.78                 | 2.8 ± 4.9          | 2.8 ± 0.67                 |
| C24:1 ( <b>35</b> )                                                     | 29 ± 6.5          | 73 ± 7.6 *                | 71 ± 18                   | 28 ± 2           | 47 ± 5                   | 99 ± 26                   | 142 ± 40                   | 76 ± 14            | 191 ± 45 *                 |
| Monoacylglycerols (nmol g <sup>-1</sup> ) (mean ± S.D.) (n=3)           |                   |                           |                           |                  |                          |                           |                            |                    |                            |
| 2-C16:0 (2-<br>palmitoylglycerol,<br><b>12</b> )                        | 1 ± 0.1           | 5.6 ± 0.6<br>***          |                           |                  |                          |                           |                            |                    |                            |

---

|                                             |             |               |
|---------------------------------------------|-------------|---------------|
| 1-C16:0 (1-palmitoylglycerol, <b>13</b> )   | 0.03 ± 0.06 | 1.1 ± 0.1 *** |
| 2-C18:1 (2-oleoylglycerol, <b>14</b> )      | 2.2 ± 0.6   | 13 ± 1 ***    |
| 1-C18:1 (1-oleoylglycerol, <b>15</b> )      | ND          | 0.3 ± 0.2 *   |
| 2-C20:4 (2-arachidonoylglycerol, <b>1</b> ) | 3.7 ± 1.0   | 48 ± 6.4 ***  |

Asterisks indicate significance, \*p<0.05, \*\*p<0.01, \*\*\*p<0.001, ND: not detected

<sup>a</sup> KIAA1363 <sup>-/-</sup> mice are compromised in CPO detoxification in brain<sup>S1</sup> and therefore 2-AG and AA changes are more dramatic in <sup>-/-</sup> compared to <sup>+/+</sup> mice.

**Supplemental Table 2.** Serine hydrolase inhibitory profiles for IDFP (10 mg kg<sup>-1</sup>) and CPO (4 mgkg<sup>-1</sup>) determined by ABPP-MudPIT.

| Abbreviation | Protein                                                                                                                                      | control |         | IDFP  |         |             | CPO   |         |             |
|--------------|----------------------------------------------------------------------------------------------------------------------------------------------|---------|---------|-------|---------|-------------|-------|---------|-------------|
|              |                                                                                                                                              | av      | SD      | av    | SD      | p-value     | av    | SD      | p-value     |
| KIAA1363     | IPI00403586 - Adult male corpora quadrigemina cDNA, RIKEN full-length enriched library, clone:B230106124 product                             | 129.33  | 28.3608 | 11.33 | 0.57735 | 0.00197 **  | 90    | 1.73205 | 0.07454     |
| PREPL        | IPI00224078 - Prolyl oligopeptidase                                                                                                          | 112.67  | 14.1892 | 122.3 | 9.07377 | 0.37644     | 110.3 | 12.4231 | 0.8408      |
| FAS          | IPI00113223 - Fatty acid synthase                                                                                                            | 112.33  | 16.6533 | 133.3 | 11.8462 | 0.14972     | 109.7 | 28.5365 | 0.89558     |
| ABHD6        | IPI00321386 - Abhydrolase domain containing 6                                                                                                | 97.667  | 20.5994 | 12    | 7.81025 | 0.00253 **  | 96.67 | 12.0968 | 0.94568     |
| MAGL         | IPI00132874 - monoglyceride lipase                                                                                                           | 91      | 23.6432 | 1     | 1.73205 | 0.00277 **  | 6.333 | 2.08167 | 0.00349 **  |
| ABHD12       | IPI00165731 - Abhydrolase domain-containing protein 12                                                                                       | 67.333  | 16.563  | 58    | 12.7671 | 0.48265     | 72.33 | 10.116  | 0.67853     |
| FAAH         | IPI00117176 - Fatty-acid amide hydrolase                                                                                                     | 59.667  | 9.50438 | 1     | 1.73205 | 0.00046 *** | 11.33 | 4.50925 | 0.00135 **  |
| BAT5         | IPI00130339 - Protein BAT5                                                                                                                   | 49.333  | 11.9304 | 36.67 | 7.63763 | 0.19636     | 48.67 | 13.6504 | 0.95227     |
| mAcoTE1      | IPI00653566 - mitochondrial acyl-CoA thioesterase 1                                                                                          | 36.667  | 9.2376  | 32    | 5.2915  | 0.48998     | 37.67 | 3.05505 | 0.86736     |
| ABHD3        | IPI00131173 - Lung alpha/beta hydrolase fold protein 3                                                                                       | 34.667  | 8.73689 | 10.33 | 3.05505 | 0.01039 *   | 7.333 | 2.08167 | 0.00621 **  |
| PEP          | IPI00761930 - Prolyl endopeptidase                                                                                                           | 33      | 1       | 44    | 7       | 0.05441     | 41.67 | 3.21455 | 0.01117     |
| iPLA2L       | IPI00120080 - similar to CALCIUM-INDEPENDENT PHOSPHOLIPASE A2                                                                                | 32.333  | 2.51661 | 28.33 | 4.04145 | 0.21931     | 36.33 | 1.52753 | 0.07822     |
| ACOT1        | IPI00115871 - Acyl-coenzyme A thioesterase 1                                                                                                 | 31.667  | 6.65833 | 26.33 | 4.72582 | 0.32113     | 30.67 | 3.78594 | 0.83218     |
| GPIDA        | IPI00652417 - GPI deacylase                                                                                                                  | 27.667  | 6.4291  | 33    | 3       | 0.26281     | 30    | 6.245   | 0.67542     |
| AARE         | IPI00387245 - Isoform 1 of Acylamino-acid-releasing enzyme                                                                                   | 25.667  | 2.08167 | 6.333 | 3.78594 | 0.00149 **  | 9.333 | 1.52753 | 0.00039 *** |
| PLA2g7       | IPI00755673 - Phospholipase A2, group VII                                                                                                    | 21.667  | 6.02771 | 23.33 | 5.85947 | 0.74859     | 16.33 | 4.04145 | 0.27201     |
| Cgi67        | IPI00108883 - Cgi67 serine protease precursor                                                                                                | 20.667  | 4.16333 | 21.67 | 7.50555 | 0.84992     | 21    | 3.60555 | 0.92156     |
| APT2         | IPI00123518 - Acyl-protein thioesterase 2                                                                                                    | 19.333  | 3.51188 | 17.33 | 4.04145 | 0.55289     | 20.67 | 7.37111 | 0.79133     |
| CE-N         | IPI00138342 - Liver carboxylesterase N precursor                                                                                             | 19.333  | 9.29157 | 0     | 0       | 0.02268 *   | 0.667 | 1.1547  | 0.02598 *   |
| PPME1        | IPI00415908 - Protein phosphatase methyltransferase 1                                                                                        | 19.333  | 4.93288 | 18.67 | 3.51188 | 0.85805     | 13.67 | 4.04145 | 0.19861     |
| ABHD4        | IPI00122628 - abhydrolase domain containing 4                                                                                                | 16      | 3       | 15.33 | 3.51188 | 0.8149      | 13.33 | 5.50757 | 0.50231     |
| ACPT1        | IPI00130018 - Isoform 1 of Acyl-protein thioesterase 1                                                                                       | 15.667  | 0.57735 | 13    | 1.73205 | 0.06468     | 14.67 | 4.72582 | 0.73442     |
| AChE         | IPI00128567 - Acetylcholinesterase precursor                                                                                                 | 15.667  | 2.51661 | 16.33 | 5.50757 | 0.85805     | 2.667 | 2.51661 | 0.00319 **  |
| Chr10BWG     | IPI00115549 - DNA segment, Chr 10, Brigham & Women's Genetics 1364 expressed                                                                 | 14      | 4.3589  | 14.67 | 2.88675 | 0.83601     | 12.33 | 4.50925 | 0.66922     |
| ABHD11       | IPI00170213 - Williams-Beuren syndrome critical region protein 21                                                                            | 14      | 4.58258 | 13    | 1.73205 | 0.74152     | 16    | 6.245   | 0.67787     |
| NTE          | IPI00128034 - Neuropathy target esterase homolog                                                                                             | 14      | 6.08276 | 0     | 0       | 0.01631 *   | 15    | 8.7178  | 0.87847     |
| RBBP9        | IPI00135277 - Isoform 1 of Retinoblastoma-binding protein 9                                                                                  | 13.333  | 1.52753 | 12    | 2.64575 | 0.49177     | 15.67 | 3.05505 | 0.30224     |
| DPP9         | IPI00462461 - Isoform 1 of Dipeptidyl peptidase 9                                                                                            | 11      | 2.64575 | 11.67 | 3.05505 | 0.78928     | 10.33 | 6.1101  | 0.87074     |
| HSL          | IPI00228826 - lipase, hormone sensitive isoform 1                                                                                            | 11      | 4.58258 | 0     | 0       | 0.01417 *   | 1.667 | 1.52753 | 0.02866 *   |
| ACS          | IPI00124428 - 1-O-acylceramide synthase precursor                                                                                            | 10.333  | 2.08167 | 11.33 | 3.78594 | 0.70899     | 9     | 3.60555 | 0.60865     |
| CPEP         | IPI00132020 - Lysosomal Pro-X carboxypeptidase precursor                                                                                     | 10.333  | 2.51661 | 9.333 | 3.05505 | 0.68427     | 7.333 | 2.51661 | 0.21807     |
| DPP8         | IPI00330837 - Dipeptidyl peptidase 8                                                                                                         | 9       | 3       | 9.333 | 3.05505 | 0.89925     | 10    | 5.19615 | 0.78717     |
| LPL1         | IPI00153133 - Lysophospholipase-like protein 1                                                                                               | 6.3333  | 1.1547  | 5.667 | 5.1316  | 0.83699     | 11    | 3.4641  | 0.09126     |
| PAFAH1Bg     | IPI00118819 - Platelet-activating factor acetylhydrolase IB subunit gamma                                                                    | 5.6667  | 0.57735 | 8     | 0       | 0.00219     | 5     | 1       | 0.3739      |
| LCTB         | IPI00109293 - Serine beta-lactamase-like protein LACTB                                                                                       | 5.3333  | 2.51661 | 5.667 | 2.51661 | 0.879       | 5     | 2       | 0.86619     |
| NTE-R        | IPI00331610 - weakly similar to NEUROPATHY TARGET ESTERASE                                                                                   | 5.3333  | 2.08167 | 0     | 0       | 0.01135 *   | 7     | 5       | 0.62227     |
| Top2         | IPI00227843 - Top2 protein                                                                                                                   | 5       | 1.73205 | 4.667 | 0.57735 | 0.76764     | 5.667 | 3.51188 | 0.78275     |
| PARLP        | IPI00124015 - Presenilins-associated rhomboid-like protein, mitochondrial precursor                                                          | 4.6667  | 1.1547  | 6.333 | 2.3094  | 0.32616     | 3.667 | 1.52753 | 0.41687     |
| ABHD13       | IPI00133177 - Abhydrolase domain containing 13                                                                                               | 3.6667  | 0.57735 | 4.333 | 0.57735 | 0.2302      | 3.667 | 1.52753 | 1           |
| CD11c        | IPI00318006 - NOD-derived CD11c +ve dendritic cells cDNA, RIKEN full-length enriched library, clone:F630106D23 product:serine hydrolase-like | 3.6667  | 2.08167 | 0.667 | 1.1547  | 0.09445     | 0.667 | 1.1547  | 0.09445     |
| LPP          | IPI00137177 - Lysosomal protective protein precursor                                                                                         | 3.3333  | 0.57735 | 3.333 | 1.52753 | 1           | 3     | 2.64575 | 0.8416      |
| PAFAH2       | IPI00123270 - Platelet-activating factor acetylhydrolase 2, cytoplasmic                                                                      | 3.3333  | 1.1547  | 2.667 | 0.57735 | 0.42165     | 3.333 | 1.52753 | 1           |
| HTRA1        | IPI00128040 - Serine protease HTRA1 precursor                                                                                                | 3       | 1       | 4     | 1       | 0.28786     | 1.667 | 2.88675 | 0.49177     |
| iPLA2        | IPI00122327 - Isoform 2 of 85 kDa calcium-independent phospholipase A2                                                                       | 3       | 1       | 3.333 | 0.57735 | 0.64333     | 5.667 | 5.1316  | 0.42689     |

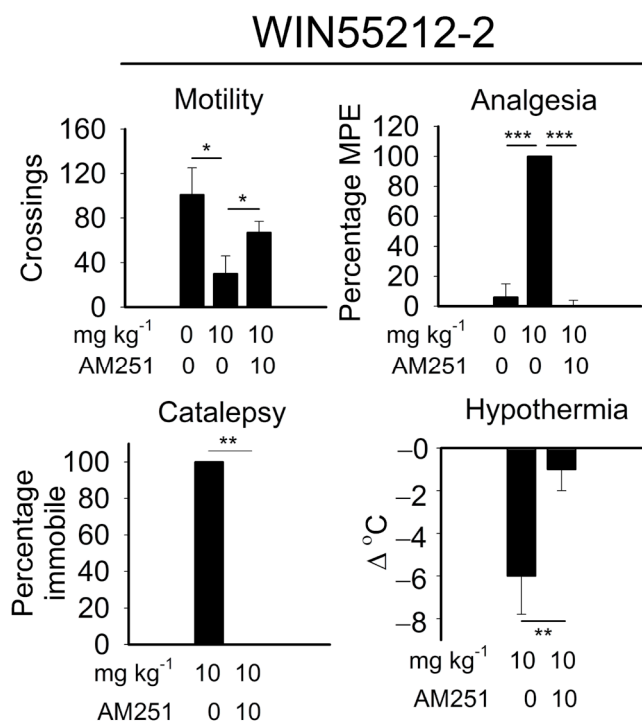

**Supplemental Figure 1** CB<sub>1</sub>-dependent effects of direct agonist WIN55212-2 in the tetrad tests for cannabinoid behavior with aversion by CB<sub>1</sub> receptor antagonist AM251 (10 mg kg<sup>-1</sup> ip). Analgesia is scored as percentage maximum possible effect (MPE). *n*=3-5 mice/group. Asterisks indicate significance, \**p*<0.05, \*\**p*<0.01, \*\*\**p*<0.001.

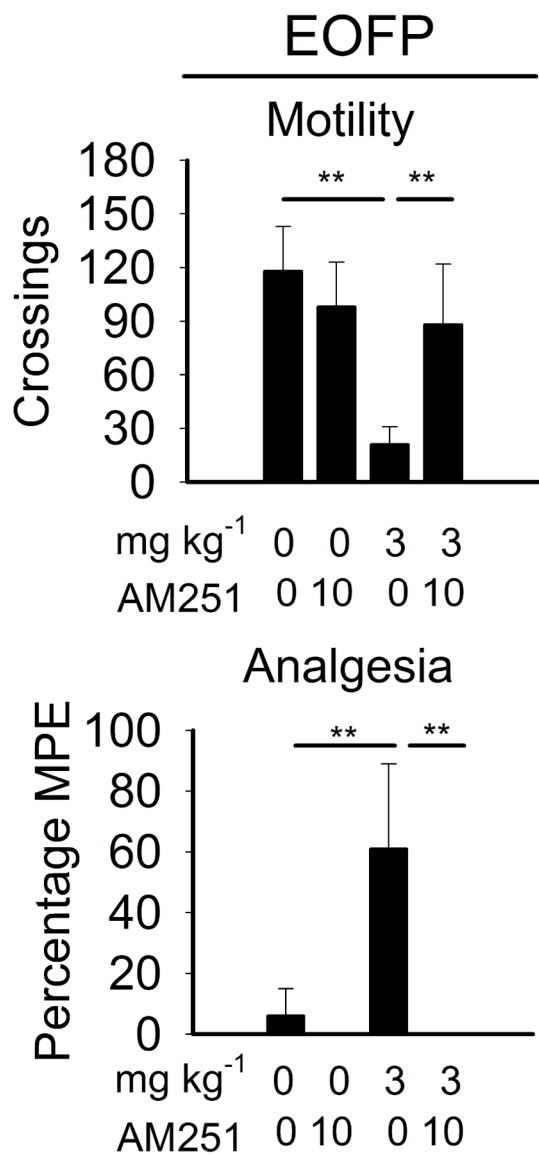

**Supplemental Figure 2** CB<sub>1</sub>-dependent effects of EOFP (3 mg kg<sup>-1</sup> ip) on behavior. AM251 preadministered at 10 mg kg<sup>-1</sup>. Analgesia is scored as percentage maximum possible effect (MPE). Data represent mean ± S.D. for *n*=5-10 mice/group. Asterisks indicate significance, \*\**p*<0.01.

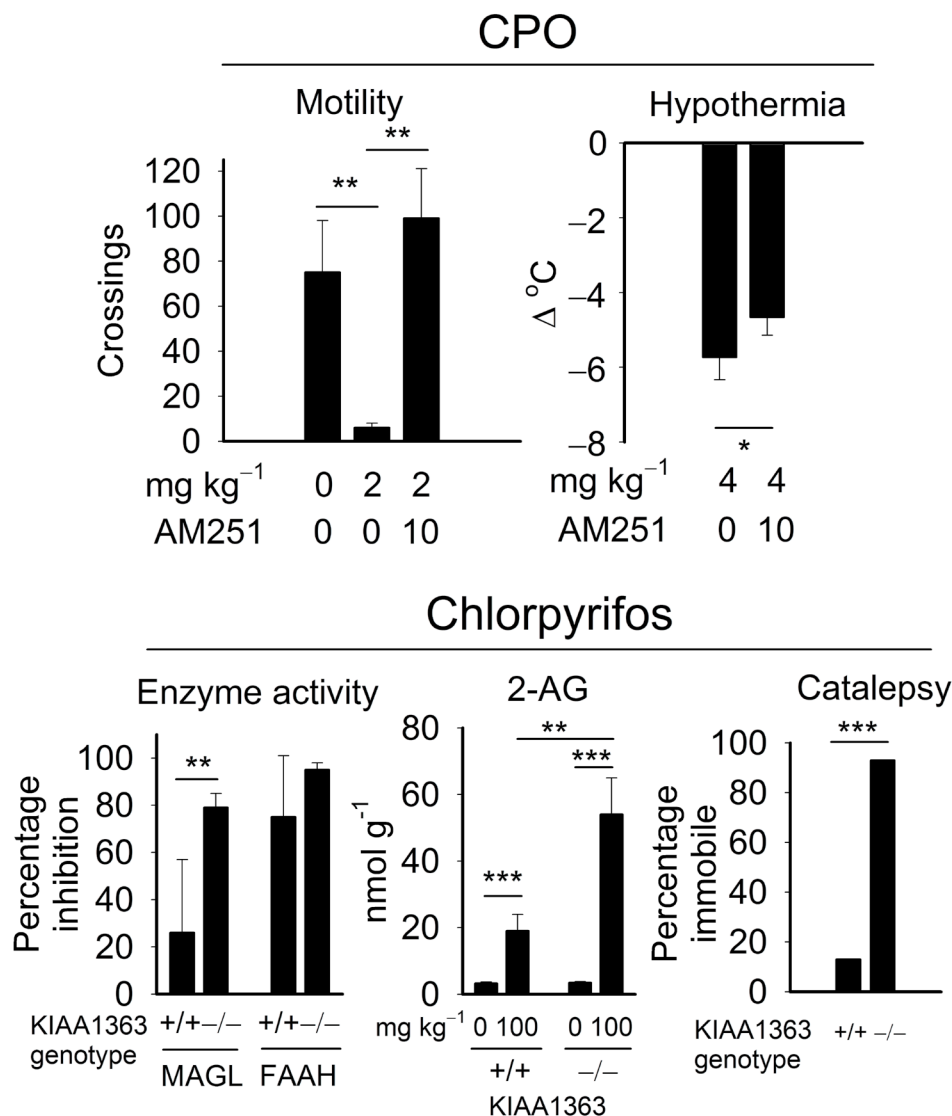

**Supplemental Figure 3** Cannabinoid-like effects of CPO and chlorpyrifos. Both CPO and chlorpyrifos elicit cannabinoid-like phenotypes during symptoms of cholinergic toxicity from AChE inhibition. CPO administered ip induces hypomotility at 2 mg kg<sup>-1</sup> and hypothermia at 4 mg kg<sup>-1</sup> averted fully and slightly by AM251 pretreatment (10 mg kg<sup>-1</sup> i.p.), respectively. Hypothermia also occurs due to increased cholinergic signaling from AChE inhibition. CPO is acutely toxic with a steep dose-response whereas chlorpyrifos (which requires bioactivation to CPO) has a slower onset and shallower dose-response curve. Therefore, cannabinoid effects were determined with chlorpyrifos at the maximum sublethal dose comparing KIAA1363 +/+ versus -/- mice<sup>S1</sup> which are compromised in their ability to detoxify CPO in the brain. Chlorpyrifos elicits greater inhibition of MAGL activity and 2-AG elevation in the brain associated with increased cataleptic behavior in KIAA1363 -/- mice compared to their +/+ counterparts. Data for 2-AG levels are derived from **Supplemental Table 1**. n=3-4 mice/group for motility, hypothermia, enzyme activity and 2-AG levels and n=13-14 mice/group for catalepsy. Asterisks indicate significance, \*p<0.05, \*\*p<0.01, \*\*\*p<0.001.

### Supplemental Reference

<sup>S1</sup> Nomura, D.K. *et al.* A brain detoxifying enzyme for organophosphorus nerve poisons. *Proc. Natl. Acad. Sci., U.S.A.* **102**, 6195-6200 (2005).
